# Supplementary material for: Onion peel derived carbon nanoparticles incorporated polysulfone membranes: enhanced dye removal from water
Source: Royal Society of Chemistry journal article supplement (doi:10.1039/d5ra00025d), 2025-01-01
Supplement: d5ra00025d1.pdf [file d5ra00025d1.pdf]

*Supplementary information*

**Onion Peel Derived Carbon Nanoparticles Incorporated Polysulfone  
Membranes: Enhanced Dye Removal from Water**

Aman Sharma<sup>a,b</sup>, Soumi Datta<sup>c</sup>, R K Sanjana<sup>b</sup>, B M Pooja<sup>b</sup>, Suryasarathi Bose<sup>c</sup>, Gurumurthy Hegde<sup>a,b\*</sup>

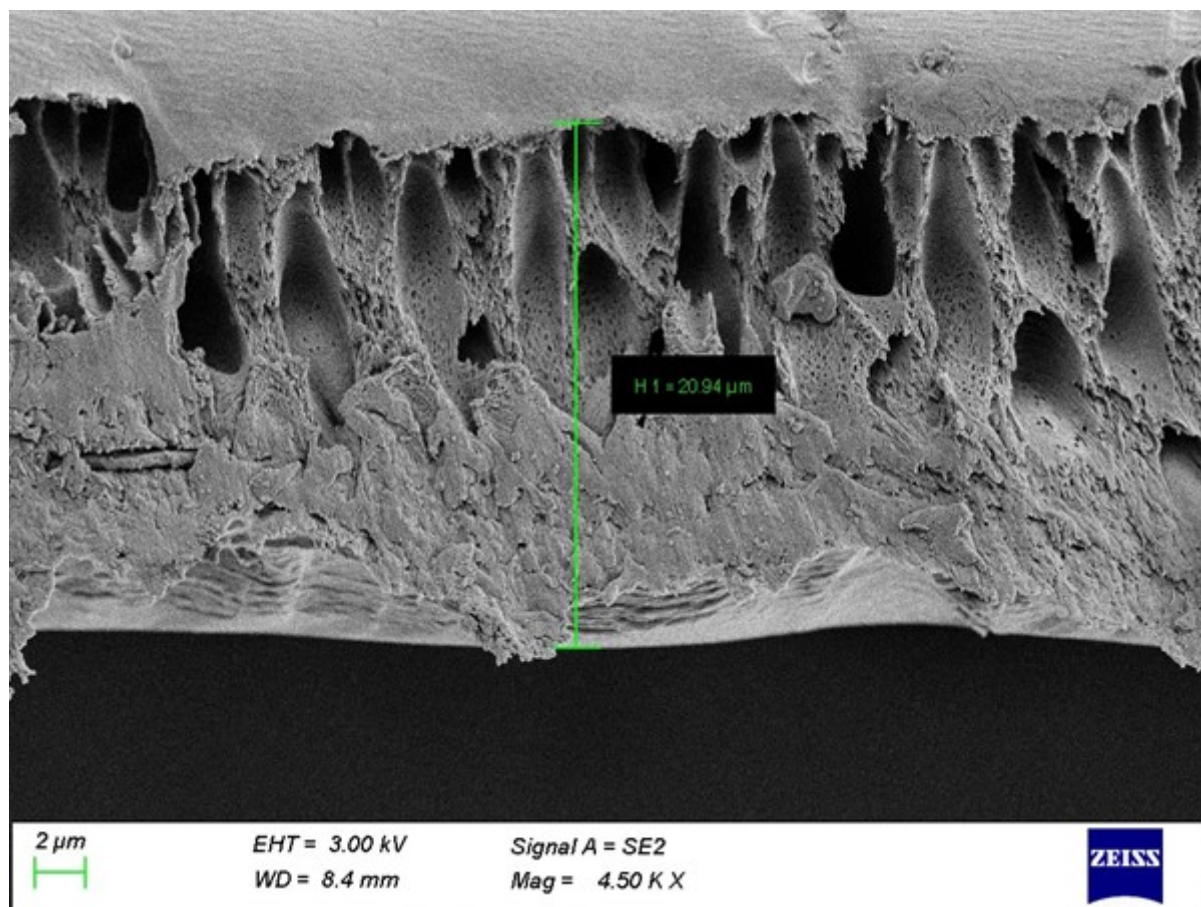

**Fig S1.** Magnified image of the Interfacial region of membrane

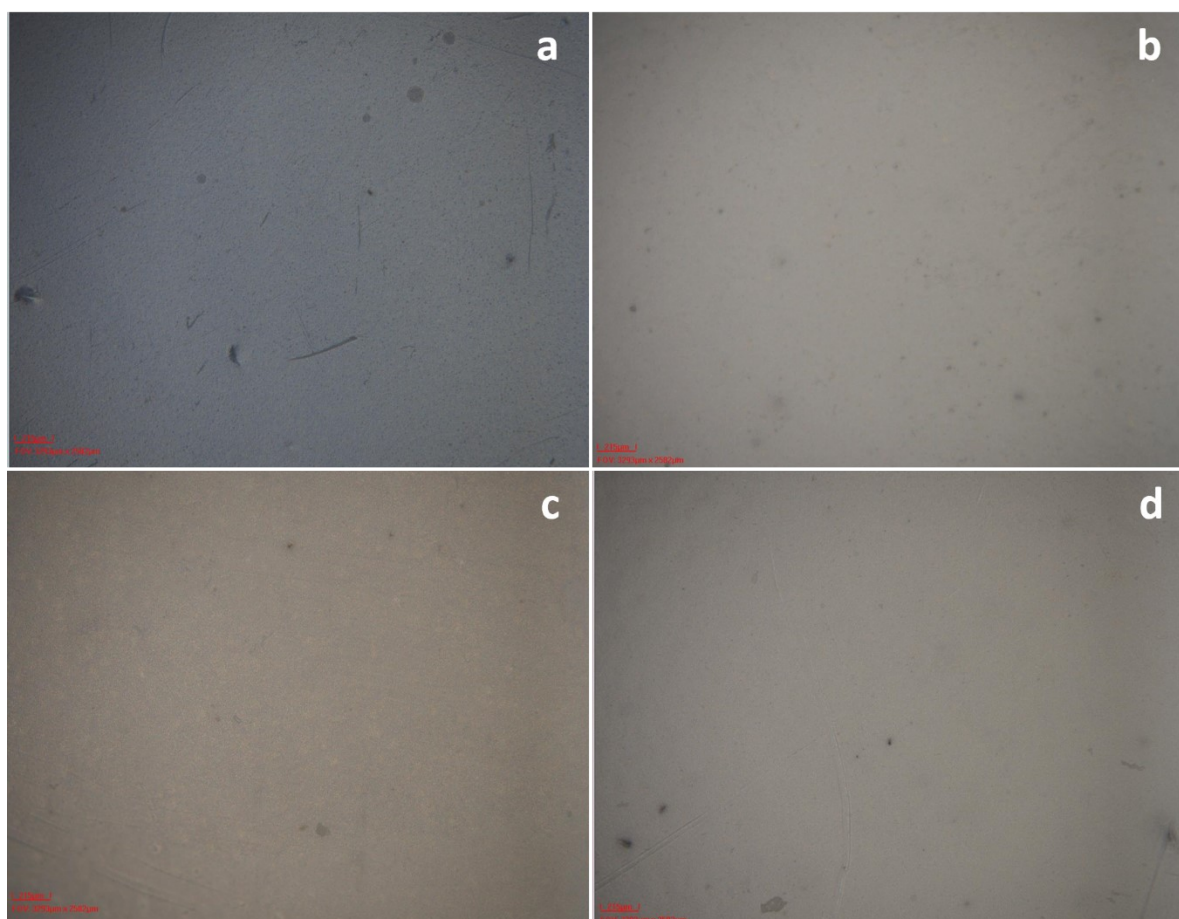

**Fig S2.** Optical Profilometry 2D- image of ON11-10@PSU pad at different thickness a) 30 $\mu$ , b) 60 $\mu$ , c) 90 $\mu$ , and d) 120 $\mu$

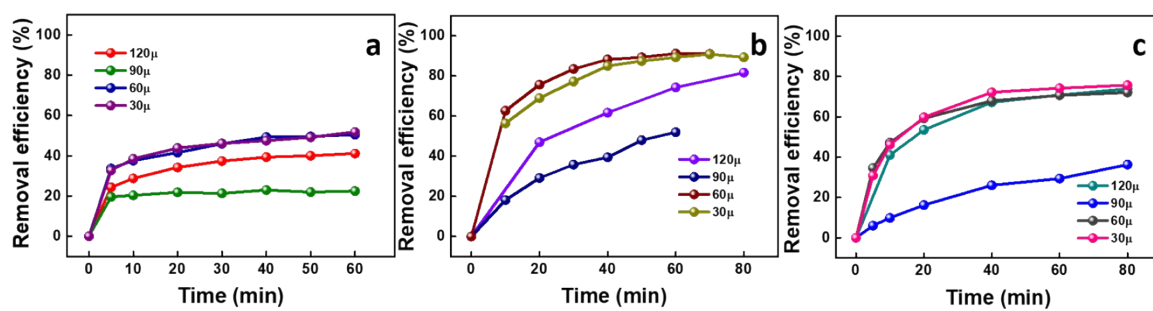

**Fig S3.** Effect of thickness of membrane for a) MB, b) MG, and c) RhB dye adsorption

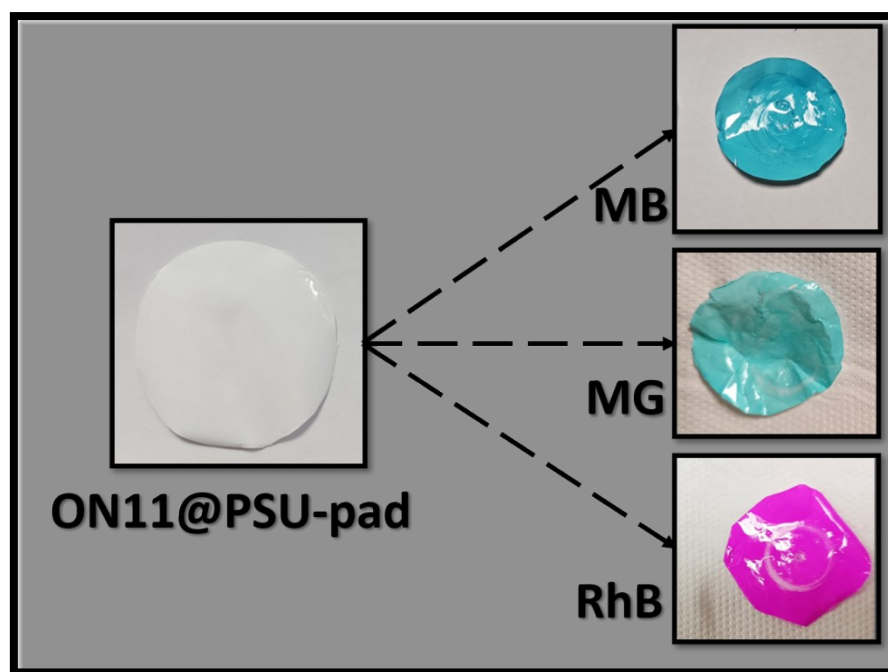

**Fig S4.** The adsorption of different dyes onto membranes

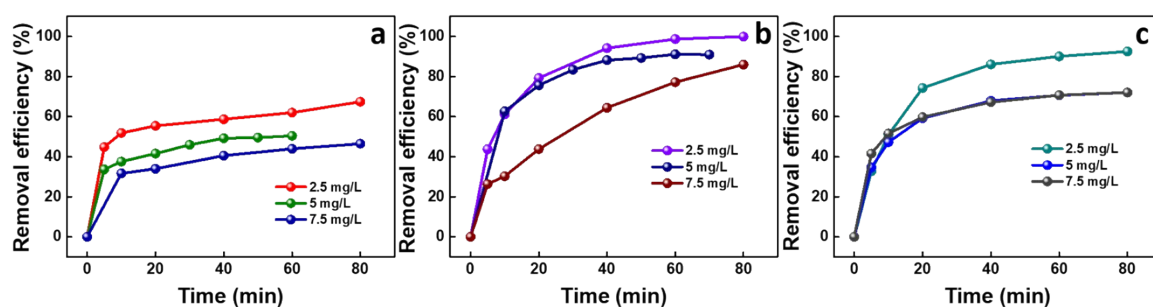

**Fig S5:** Effect of dye concentration on membrane for a) MB, b) MG and c) RhB dye adsorption

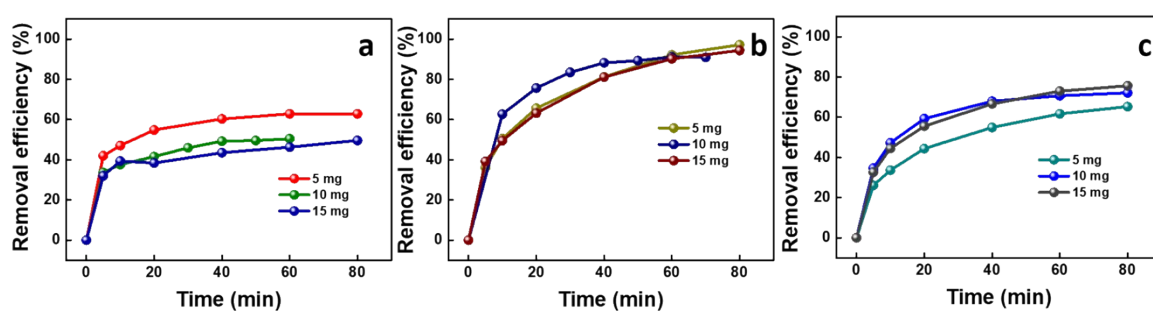

**Fig S6:** Effect of nanoparticle dosage on the membrane for a) MB, b) MG, and c) RhB dye adsorption

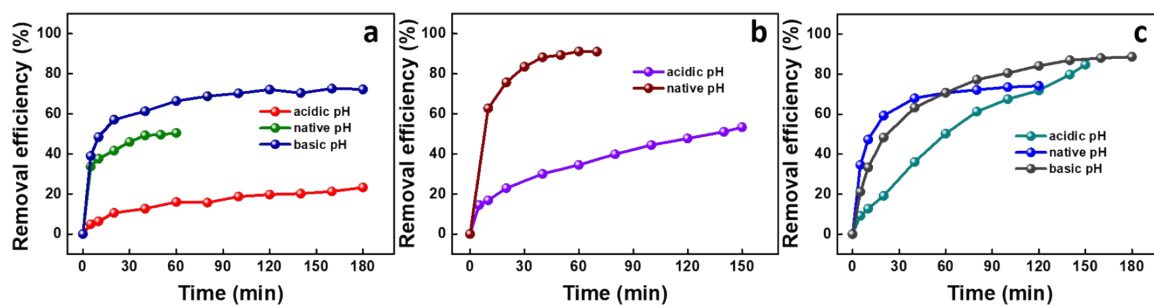

**Fig S7.** Effect of pH of dye solution on membrane for a) MB, b) MG, and c) RhB dye adsorption

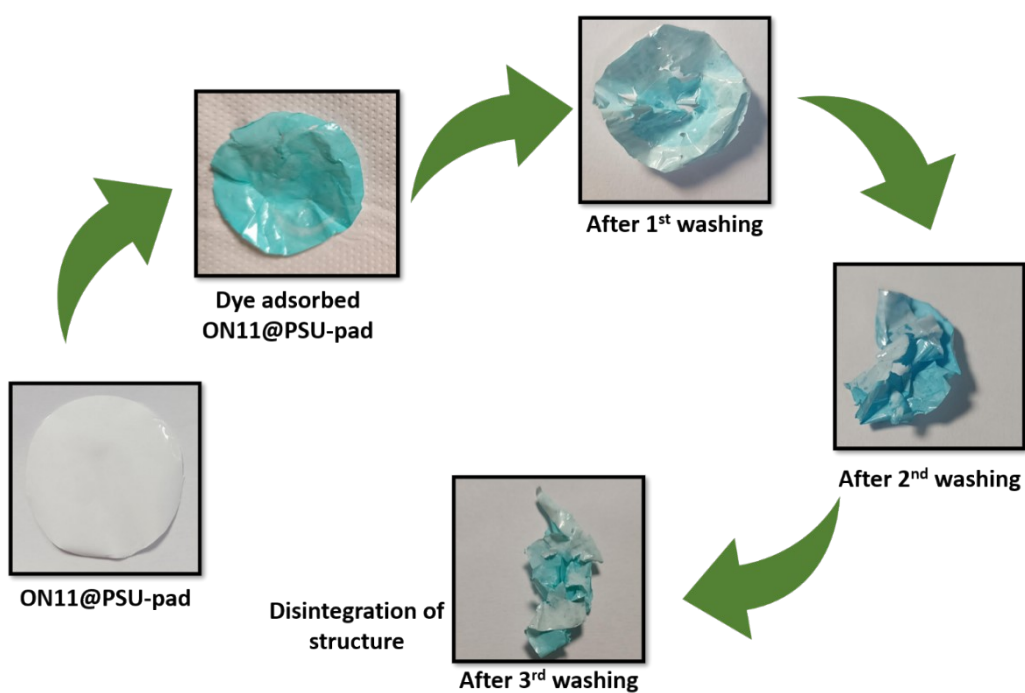

**Fig S8.** Disintegration of the membrane with an increase in the number of recyclability test

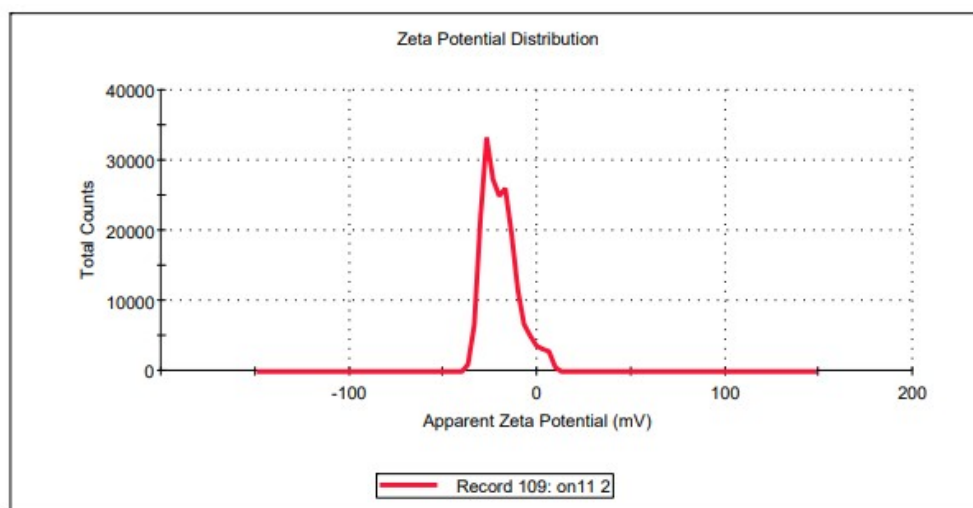

**Fig S9.** Zeta potential ON11 CNS

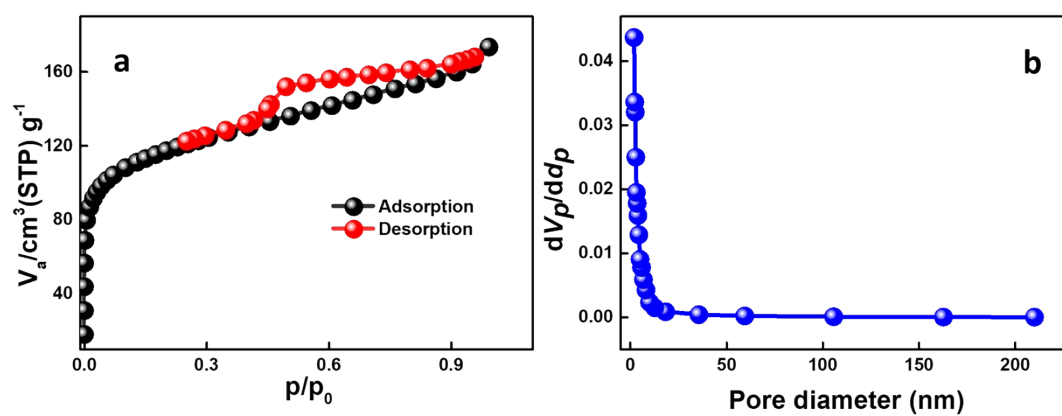

**Fig S10.** a)  $\text{N}_2$  adsorption-desorption curves; b) Pore size distribution of ON11 CNS
